# Supplementary material for: The molecular basis for SARS-CoV-2 binding to dog ACE2
Source: PubMed Central journal article supplement (PMC8263772; doi:10.1038/s41467-021-24326-y), 2021-07-07
Supplement: 41467_2021_24326_MOESM1_ESM.pdf [file 41467_2021_24326_MOESM1_ESM.pdf]

# Supplementary Information

Supplementary Figure 1

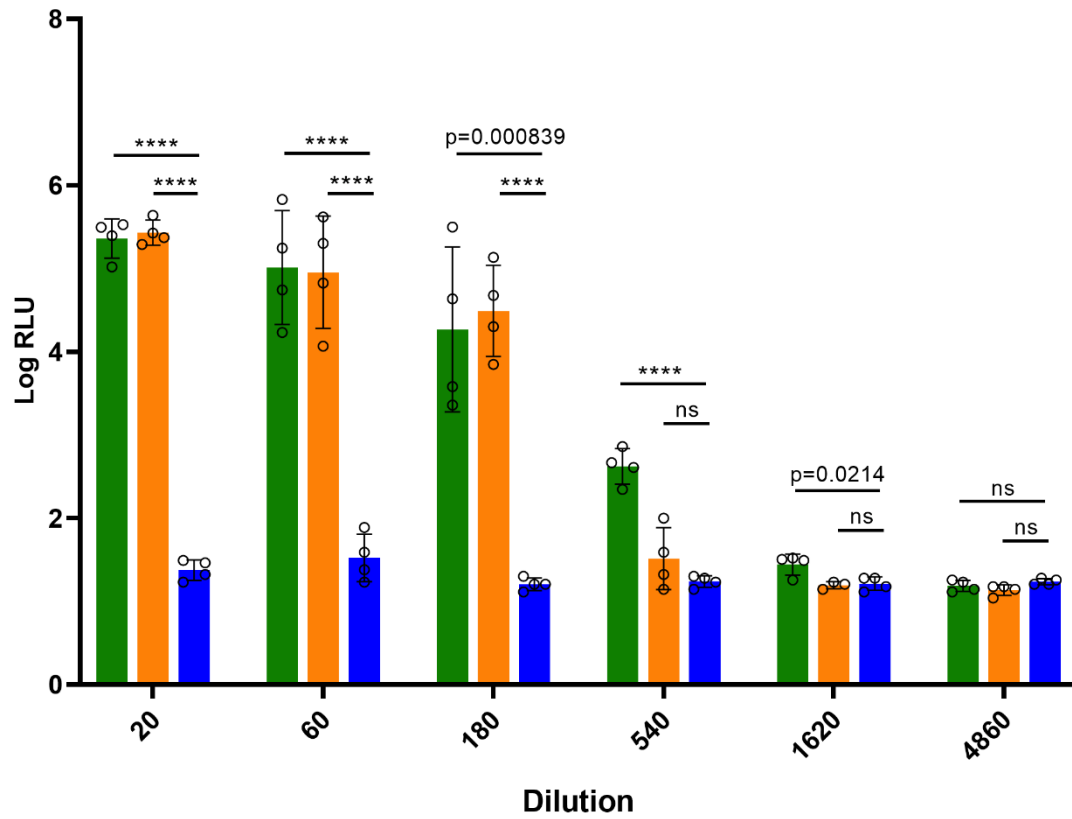

**Supplementary Figure 1.** Infection of dACE2- or hACE2-expressing HeLa cells with the SARS-CoV-2 S protein-bearing pseudovirus. Data are presented as mean values  $\pm$  SD of quadruplicate cell samples. \*\*\*\*,  $p < 0.0001$ ; ns means no significant differences; two-sided Student's *t*-test.

## Supplementary Figure 2

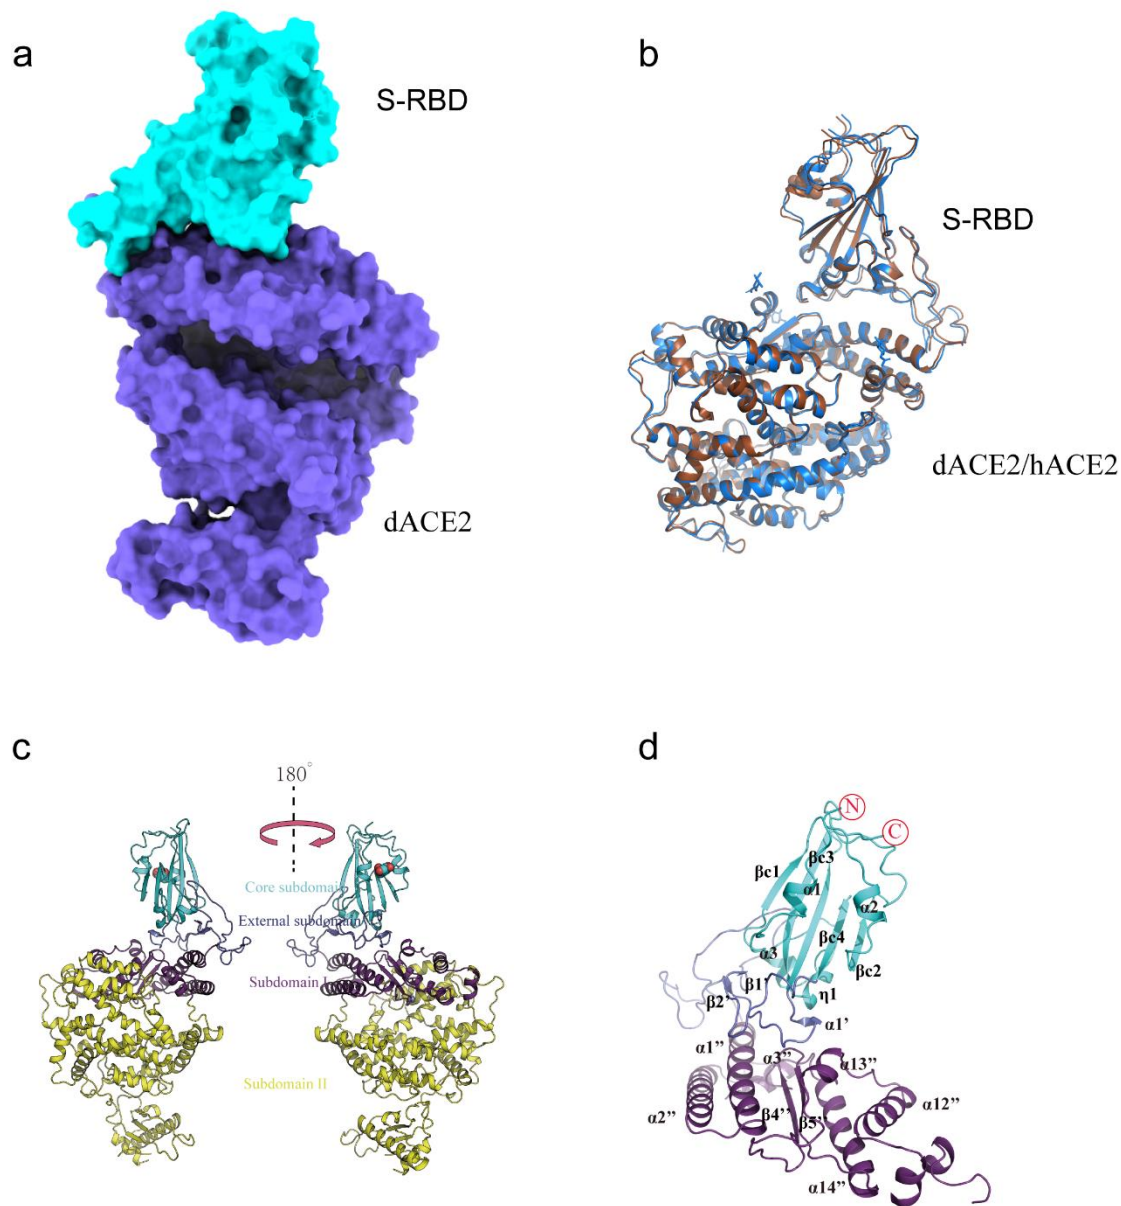

**Supplementary Figure 2. The crystal structure of the RBD/dACE2 complex.** (a) The overall crystal structure of the RBD/dACE2 complex. RBD is labeled in cyan and dACE2 in blue. (b) Alignment of the RBD/dACE2 complex (brown) to the RBD/hACE2 complex (marine, PDB ID: 6LZG). (c) The subdomains of RBD and dACE2 at two side viewpoints of 180° rotation. The RBD core subdomain, RBD external subdomain, dACE2 subdomain I and dACE2 subdomain II are colored with cyan, slate, purple, and yellow, respectively. (d) The secondary structural elements in

the RBD and dACE2 subdomain I in the complex. The subdomains are colored the same as in (c).

### Supplementary Figure 3

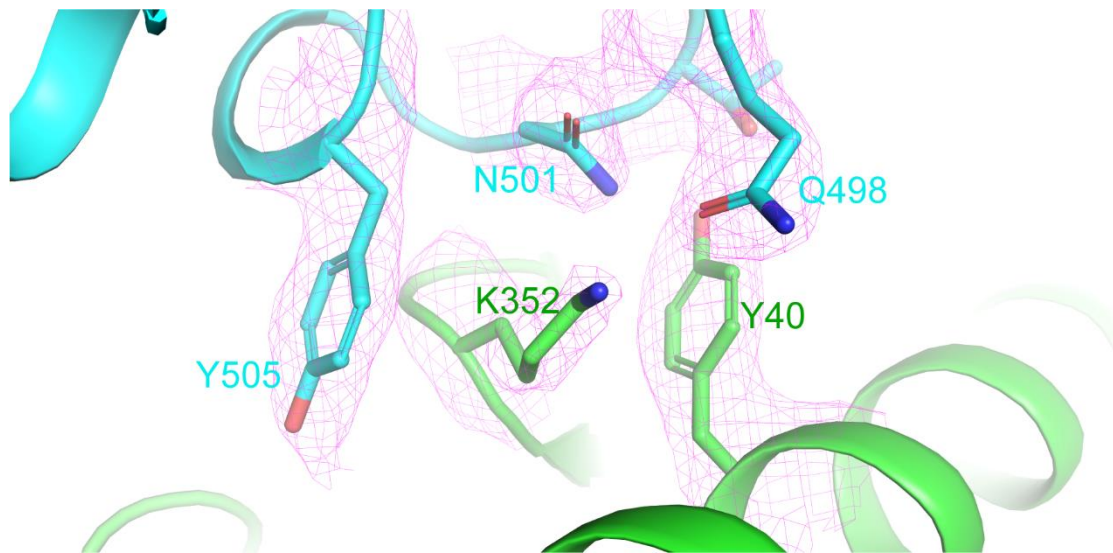

**Supplementary Figure 3. The local 2Fo-Fc electronic density map at 1.0  $\sigma$  for the binding interface in the RBD/ dACE2 complex. The electronic density is represented as pink mesh. RBD is shown as cyan and dACE2 is shown as green.**

## Supplementary Figure 4

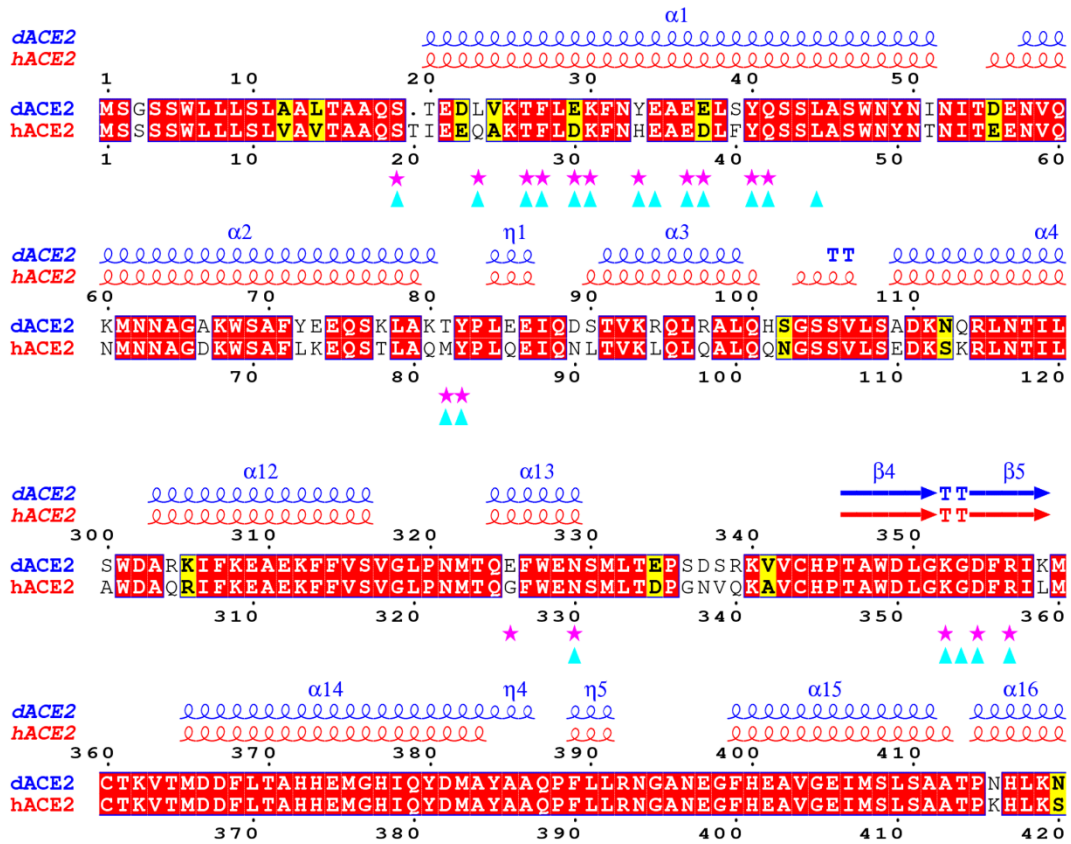

**Supplementary Figure 4. Sequence alignment of dACE2 and hACE2.** The dACE2 residues that contact with RBD in the RBD/ dACE2 are shown as hot pink stars. The hACE2 residues that make contact with RBD in the RBD/ hACE2 are shown as cyan triangles. The sequence alignment was performed with MEGAX<sup>1</sup> and visualized with ESPrpt<sup>2</sup>. The columns with residues in white and the background in red indicate a strict identity, and the columns with residues in black and the background in yellow indicate a similarity score over 0.7, considering the physio-chemical property.

**Supplementary Figure 5**

|          |                                    |                                                                      |
|----------|------------------------------------|----------------------------------------------------------------------|
|          |                                    | 417                                                                  |
| <b>a</b> | hCoV-19/Wuhan/WIV04/2019           | I A P G Q T G <span style="background-color: red;">K</span> I A D    |
|          | hCoV-19/Germany/BY-MGZ-03/2020     | I A P G Q T G <span style="background-color: blue;">N</span> I A D   |
|          | hCoV-19/England/QEUIH-9983ED/2020  | I A P G Q T G <span style="background-color: blue;">N</span> I A D   |
|          | hCoV-19/Scotland/QEUIH-96CEC3/2020 | I A P G Q T G <span style="background-color: blue;">N</span> I A D   |
|          | hCoV-19/pangolin/Guangxi/P1E/2017  | I A P G Q T G <span style="background-color: yellow;">V</span> I A D |
|          | hCoV-19/pangolin/Guangxi/P4L/2017  | I A P G Q T G <span style="background-color: yellow;">V</span> I A D |
| <b>b</b> |                                    | 501                                                                  |
|          | hCoV-19/Wuhan/WIV04/2019           | Y G F Q P T <span style="background-color: blue;">N</span> G V G Y   |
|          | hCoV-19/USA/MA-JLL-D152/2020       | Y G F Q P T <span style="background-color: green;">Y</span> G V G Y  |
|          | hCoV-19/England/CAMC-B533FB/2020   | Y G F Q P T <span style="background-color: green;">Y</span> G V G Y  |
|          | hCoV-19/Wales/PHWC-4897BB/2020     | Y G F Q P T <span style="background-color: green;">Y</span> G V G Y  |
|          | hCoV-19/Wales/PHWC-47DA93/2020     | Y G F Q P T <span style="background-color: green;">Y</span> G V G Y  |
|          | hCoV-19/Australia/VIC2173/2020     | Y G F Q P T <span style="background-color: green;">Y</span> G V G Y  |

**Supplementary Figure 5. Alignment of parts of the RBD amino acid sequences from different strains containing the relevant mutations tested in the present study.**

(a) Alignment of SARS-CoV-2 S protein containing the K417N and the K417V mutations with the reference sequence (hCoV-19/Wuhan/WIV04/2019). (b) Alignment of SARS-CoV-2 S protein contain the N501Y mutation with the reference sequence (hCoV-19/Wuhan/WIV04/2019). The sequence alignment was prepared with MEGAX<sup>1</sup>. The residue positions 417 (a) and 501 (b) are highlighted in different colors.

**Supplementary Figure 6**

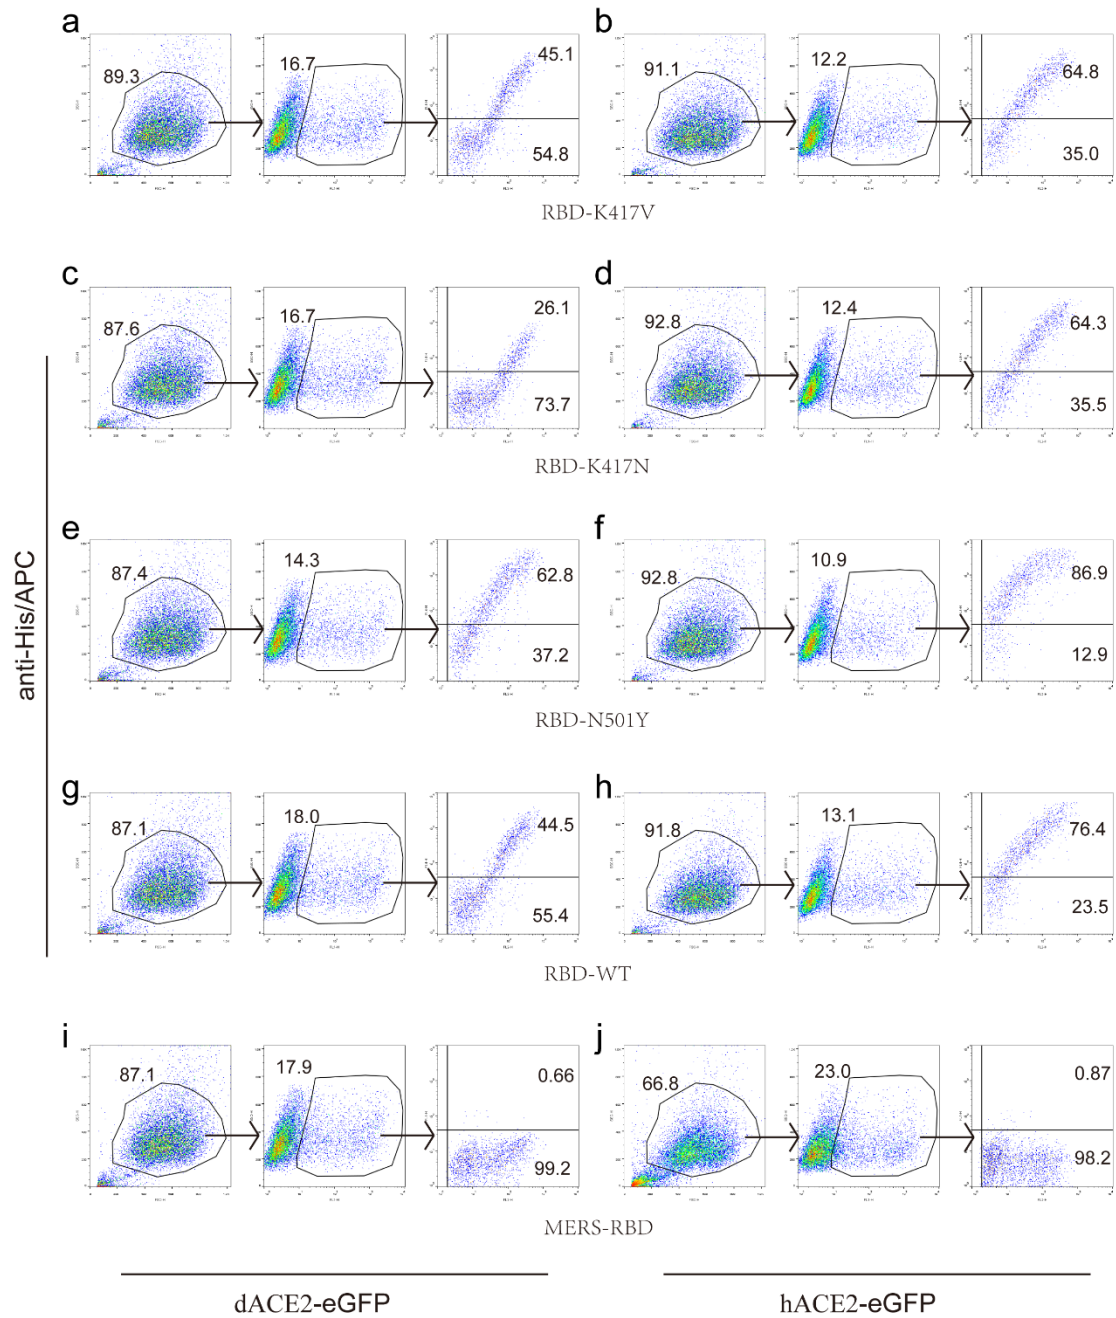

**Supplementary Figure 6. The gating strategy for flow cytometry analysis of SARS-CoV-2 RBD interface residue mutants, wt RBD, or MERS-CoV RBD binding to BHK21 cells expressing dACE2 or hACE2.** The cells expressing dACE2-eGFP (a, c, e, g, i) or hACE2-eGFP (b, d, f, h, j) were incubated with His-tagged RBD K417V mutant (a and b), RBD K417N mutant (c and d), RBD N501Y (e and f), wt RBD (g and h) or MERS-CoV RBD (i and j), respectively. The cells were the strained with the anti-

His/APC antibody and subjected to flow cytometry analysis. The cells populated based on the forward scatter (FSC) and the side scatter (SSC) signals were first gated with the eGFP fluorescent densities. The eGFP<sup>+</sup> cell population were further divided into the APC<sup>+</sup> population (cells binding to RBD or its mutants) and APC<sup>-</sup> population (cells not binding to RBD or its mutants). The percentages of the APC<sup>+</sup> eGFP<sup>+</sup> cells and the APC<sup>-</sup> eGFP<sup>+</sup> cells in the eGFP<sup>+</sup> cells are indicated.

**Supplementary Table 1. Data collection and refinement statistics**

| <b>SARS2-CoV-2<br/>RBD/dACE2</b>    |                        |
|-------------------------------------|------------------------|
| <b>Data collection</b>              |                        |
| Space group                         | I422                   |
| Cell dimensions                     |                        |
| <i>a, b, c</i> (Å)                  | 168.26, 168.26, 211.20 |
| $\alpha, \beta, \gamma$ (°)         | 90.00, 90.00, 90.00    |
| Resolution (Å)                      | 50.00-3.00 (3.11-3.00) |
| Unique reflections                  | 30355 (2989)           |
| Completeness (%)                    | 98.5 (99.5)            |
| $R_{\text{merge}}$                  | 0.18.4 (0.599)         |
| $I/\sigma I$                        | 8.8 (2.6)              |
| CC <sub>1/2</sub> (%)               | 0.980 (0.819)          |
| Redundancy                          | 6.3 (6.2)              |
| <b>Refinement</b>                   |                        |
| Resolution (Å)                      | 48.26-3.00             |
| No. reflections                     | 29668                  |
| $R_{\text{work}} / R_{\text{free}}$ | 0.2272/0.2479          |
| No. atoms                           |                        |
| Protein                             | 7244                   |
| Ligand/ion                          | 1                      |
| Water                               | 0                      |
| <i>B</i> -factors                   |                        |
| Protein                             | 52.6                   |
| Ligand/ion                          | 76.8                   |
| Water                               |                        |
| R.M.S. deviations                   |                        |
| Bond lengths (Å)                    | 0.002                  |
| Bond angles (°)                     | 0.531                  |
| Ramchandran                         |                        |
| Statistics (%)                      |                        |
| Favored                             | 96.49                  |
| Allowed                             | 3.51                   |
| Disallowed                          | 0.00                   |

Values in parentheses are for the highest resolution shell.



**Supplementary Table 2. Comparison of residue contacts of SARS-CoV-2 RBD binding to dACE2 and hACE2**

| <b>SARS-CoV-2 RBD</b>              | <b>dACE2</b>                                                       | <b>hACE2</b>                                     |
|------------------------------------|--------------------------------------------------------------------|--------------------------------------------------|
| R403 (1/0)                         | Y33(1)                                                             | -                                                |
| K417 (2, <u>1</u> /3, <u>1</u> )   | E29 (1, <u>1</u> )                                                 | D30 (3, <u>2</u> )                               |
| G446 (1, <u>1</u> /1, <u>1</u> )   | Q41 (0, <u>1</u> )                                                 | Q42 (1)                                          |
| Y449 (6, <u>2</u> /8, <u>2</u> )   | E37 (4, <u>1</u> ), Q41 (0, <u>1</u> )                             | D38 (5, <u>1</u> ), Q42 (1, <u>1</u> )           |
| Y453 (6/3)                         | Y33 (6)                                                            | H34 (3)                                          |
| L455 (3/4)                         | E29(1), Y33 (2)                                                    | H34 (4)                                          |
| F456 (4/7)                         | T26 (3), E29 (1)                                                   | T27 (5), D30 (1), K31 (1)                        |
| A475 (3/5, <u>1</u> )              | L23(2), T26(1)                                                     | S19 (3,1), Q24 (1), T27 (1)                      |
| G476 (0/2)                         |                                                                    | S19 (2)                                          |
| F486 (10/11)                       | T81(3), T82 (7)                                                    | M82 (4), Y83 (7)                                 |
| N487 (4, <u>1</u> /11, <u>2</u> )  | L23 (1), Y82 (3, <u>1</u> )                                        | Q24 (7, <u>1</u> ), Y83 (4, <u>1</u> )           |
| Y489 (7/7, <u>1</u> )              | T26 (1), F27 (3), K30 (2), Y82 (1)                                 | T27 (2), F28 (4), Y83 (0, <u>1</u> )             |
| F490 (0/ <u>1</u> )                |                                                                    | K31 (0, <u>1</u> )                               |
| Q493 (0/8, <u>1</u> )              |                                                                    | H34 (3), E35 (4, <u>1</u> )                      |
| G496 (6, <u>1</u> /2, <u>1</u> )   | E37 (2), K352 (4, <u>1</u> )                                       | D38 (1), K353 (1, <u>1</u> )                     |
| Q498 (10, <u>2</u> /19, <u>1</u> ) | E37 (2, <u>1</u> ), Y40(3), Q41 (2, <u>1</u> ), K352(3, <u>1</u> ) | D38(1), Y41(7), Q42(9, <u>1</u> ), L45(2)        |
| T500 (17, <u>2</u> /17, <u>1</u> ) | Y40 (6, <u>1</u> ), N329(4), D354 (6, <u>1</u> ), R356 (1)         | Y41 (5, <u>1</u> ), N330 (3), D355 (5), R357 (3) |
| N501 (11, <u>1</u> /10, <u>2</u> ) | Y40 (5, <u>1</u> ), E325(1), K352(5)                               | Y41 (5, <u>1</u> ), K353 (4, <u>1</u> )          |
| G502 (7, <u>1</u> /8, <u>1</u> )   | K352 (2, <u>1</u> ), G353(5)                                       | K353 (3, <u>1</u> ), G354 (5)                    |
| Y505 (27, <u>2</u> /20, <u>1</u> ) | E36(7, <u>1</u> ), K352 (18), R392(1, <u>1</u> )                   | E37 (2, <u>1</u> ), K353 (15), G354 (2), R392(1) |
| Q506(1, <u>1</u> /0)               | E325(1, <u>1</u> )                                                 |                                                  |
| Total                              | 127, <u>13</u>                                                     | 145, <u>16</u>                                   |

The numbers in parentheses of SARS-CoV-2 RBD residues represent the number of vdw and H-bond/salt bridges contacts between the indicated residue with dACE2 (the former) and hACE2 (the latter). The numbers in parentheses of ACE2 residues represent the numbers of vdw contacts the indicated residues conferred. The numbers with underlines suggest numbers of potential H-bonds or salt bridges between the pairs of residues. Vdw contacts were analyzed at a cutoff of 4 Å. H-bonds/salt bridges were analysis with PDBePISA (<https://www.ebi.ac.uk/pdbe/pisa/>)

**Supplementary Table 3. Hydrogen bonds and salt bridges at the binding interfaces of in the dACE2/SARS-CoV-2 RBD and the hACE2/ SARS-CoV-2 RBD complexes (\*)**

|               | dACE2/SARS-CoV-2 RBD complex |      |         |          |         |         | hACE2/ SARS-CoV-2 RBD complex |         |      |          |         |      |
|---------------|------------------------------|------|---------|----------|---------|---------|-------------------------------|---------|------|----------|---------|------|
|               | Chain B                      |      |         | Distance | Chain A |         | No.                           | Residue | Atom | Distance | Residue | Atom |
| No.           | Residue                      | Atom | Residue |          | Atom    | Residue |                               |         |      |          |         |      |
| Hydrogen bond | 1                            | K417 | NZ      | 3.25     | E29     | OE1     | 1                             | K417    | NZ   | 2.86     | D30     | OD1  |
|               | 2                            | Y449 | OH      | 2.66     | E37     | OE2     | 2                             | Y449    | OH   | 3.09     | Q42     | OE1  |
|               | 3                            | N487 | ND2     | 3.16     | Y82     | OH      | 3                             | Y449    | OH   | 2.83     | D38     | OD1  |
|               | 4                            | Q498 | NE2     | 2.92     | E37     | OE2     | 4                             | N487    | ND2  | 2.82     | Y83     | OH   |
|               | 5                            | T500 | OG1     | 2.43     | Y40     | OH      | 5                             | Y489    | OH   | 3.54     | Y83     | OH   |
|               | 6                            | N501 | N       | 3.73     | Y40     | OH      | 6                             | Q493    | NE2  | 3.39     | E35     | OE1  |
|               | 7                            | G502 | N       | 2.92     | K352    | O       | 7                             | Q498    | NE2  | 2.57     | Q42     | OE1  |
|               | 8                            | Y505 | OH      | 2.52     | E36     | OE2     | 8                             | T500    | OG1  | 2.73     | Y41     | OH   |
|               | 9                            | Q506 | NE2     | 3.59     | E325    | OE2     | 9                             | N501    | N    | 3.62     | Y41     | OH   |
|               | 10                           | G446 | O       | 3.61     | Q41     | NE2     | 10                            | G502    | N    | 2.79     | K353    | O    |
|               | 11                           | Y449 | OH      | 3.36     | Q41     | NE2     | 11                            | Y505    | OH   | 3.66     | E37     | OE1  |
|               | 12                           | G496 | O       | 2.97     | K352    | NZ      | 12                            | A475    | O    | 2.81     | S19     | OG   |
|               | 13                           | Y505 | OH      | 3.6      | R392    | NH2     | 13                            | N487    | OD1  | 2.87     | Q24     | NE2  |
|               |                              |      |         |          |         |         | 14                            | F490    | O    | 3.82     | K31     | NZ   |
|               |                              |      |         |          |         |         | 15                            | G496    | O    | 3.22     | K353    | NZ   |
| Salt bridge   | 1                            | K417 | NZ      | 3.25     | E29     | OE1     | 1                             | K417    | NZ   | 3.76     | D30     | OD2  |
|               |                              |      |         |          |         |         | 2                             | K417    | NZ   | 2.86     | D30     | OD1  |

(\*) H-bonds/salt bridges were analysis with PDBEPIISA (<https://www.ebi.ac.uk/pdbe/pisa/>)

## Supplementary Table 4. Codon optimized gene sequence for proteins expression

### 1. dACE2, tagged with 6xHis, cloned into pET21a with NdeI and XhoI

CATATGCAGTCAACAGAAGATCTTGTTAAGACGTTTCCTTGAGAAGTTCAATTATGAAGCTGAAGAAGCTTTCATAT  
CAGTCATCACTTGCTTCATGGAACATAACATTAACATTACAGATGAGAATGTCCAGAAGATGAATAACGCTGGC  
GCTAAATGGTCAGCTTCTACGAGGAACAGTCAAAGCTAGCAAAGACTTACCCTCTTGAAGAAATTCAGGATTC  
AACAGTTAAACGCCAGCTTCGCGCTCTTCAGCATTACAGGCTCATCAGTTCTTTCAGCTGATAAGAATCAACGCCT  
TAACACAATTCTTAACCTCAATGTCAACAATTATTCAACAGGCAAAGCTTGTAAACCCTTCAAACCCTCAGGAATG  
TCTTCTTCTGAACTGGTCTGGACGACATAATGGAGAATAGTAAGGACTACAACGAACGCCTTTGGGCTTGGGA  
AGGCTGGCGCTCAGAAGTTGGCAAACAGCTTCGCCCTCTTATGAAGAATATGTTGCTCTTAAGAATGAGATGGC  
TCGCGCTAAACAATATGAAGATTATGGCGATTATTGGCGCGCGATTATGAAGAAGAATGGGAGAATGGATATAA  
CTATTCACGCAACCAGCTTATTGATGATGTTGAACATACATTTACACAGATTATGCCTCTTATCAGCATCTTCATG  
CTTATGTTTCGCAAAAAGCTAATGGATACATATCCTTCATATATTTACCTACAGGCTGTCTTCCCTGCTCATCTTCTG  
GCGATATGTGGGGACGGTTCTGGACCAACCTTTATCCTCTTACAGTTCCTTTTCGGTCAGAAGCCAAATATTGATGT  
TACAAACGCTATGGTTAACCAGTCATGGGATGCTCGCAAGATCTTTAAGGAGGCTGAGAAGTTCTTCGTTTCGGT  
TGGCCTTCTAACATGACACAGGAATTCTGGGAGAACTCAATGCTTACAGAACCTTCAGATTCACGCAAAGTTGT  
TTGTCATCTACAGCTTGGGATCTTGGCAAAGGCGATTTCGGATCAAGATGTGCACAAAGGTGACGATGGATGA  
TTTCTGACCGCTCATCATGAAATGGGCCATATTCAGTATGATATGGCTTATGCTGCTCAGCCTTCTCTTACGCA  
ACGGCGCTAACGAAGGCTTTCATGAAGCTGTTGGCGAAATTATGTCACCTTTCAGCTGCTACACCTAACCATCTTA  
AGAATATAGGCCTTCTTCTCCTTCATCTTTCGAGGACTCAGAAACAGAAATTAACCTTCTTCTTAAACAGGCTCT  
TACAATTGTTGGCACACTTCTTTCACGTACATGCTTGAGAAGTGGCGTTGGATGGTATTCAAGGGTGAGATCCC  
TAAAGATCAGTGGATGAAGACTTGGTGGGAAATGAAACGCAACATTGTTGGCGTTGTTGAACCTGTTCCCTCATG  
ATGAAACATATTGTGATCCTGCTTCACTGTTCCACGTGGCTAACGATTATTCATTTATTCGCTATTATACACGCACA  
ATTTATCAGTTTCAGTTTCAGGAAGCTCTTGTGATGCTAAACATGAAGGCCCTTTCATAAATGTGATATTT  
AAACTCATCAGAAGCTGGCCAGAACTTCTTGAATGCTTAAACTTGGCAAATCAAAGCCGTGGACTTATGCTC  
TTGAAATTGTTGTTGGCGCTAAGAATATGGATGTTTCGCCCTCTTCTTAACTATTTTCGAGCCGCTTCTCACTTGGCTT  
AAAGAACAGAACCACAACCTCATTGTTGGCTGGAACACAGATTGGTCACCTTATGCTGATCAGTCAATTAAGTT  
CGCATTTCACTTAAATCAGCTCTTGGCGAGAAGGCCTACGAATGGAACAACAACGAAATGTATCTCTCAGATCT  
TCAATTGCTTATGCTATGCGCCAGTATTTCTCCGAGGTTAAGAATCAAACAATTCCTTTCGTCGAGGATAACGTTT  
GGGTTTCAGATCTTAAACCTCGCATTTTCACTTAACTTCTTCGTCACCTCACCTGGCAACGTTTCAGATATTATTCCT  
CGCACAGAAGTTGAAGAAGCTATTCGCATGTATCGCTCACGCATTAACGATGTATTCCGGCTAGACGACAATAGT  
CTTGAATTTCTTGGCATTACGCTACACTTGGCCCTCTTATGAACCTCCTGTTACACATCATCATCATCATCATCATG  
ACTCGAG

## 2. hACE2, fused with mFc, cloned into pCAGGS with NdeI and XhoI

CATATGTCAACAATTGAAGAACAGGCTAAGACCTTCCTTGATAAATTTAACCATGAAGCTGAAGATCTCTTCTACC  
AATCATCACTTGCTTCATGGAACATAACACAAACATTACAGAAGAGAATGTCCAGAACATGAACAACGCTGGC  
GATAAATGGTCAGCTTTCTTGAAGGAACAGTCAACACTTGCTCAGATGTATCCTCTTCAGGAAATTCAGAACCTT  
ACAGTTAACTTCAGCTTCAGGCTCTCAGCAGAATGGTTCTTCGGTGTATCAGAAGATAAATCAAAGAGGCTC  
AACACAATTCTTAACACAATGTCAACAATTTATTCAACAGGCAAAGTTTGTAACCCTGATAACCCTCAGGAATGT  
CTTCTTCTTGAACCTGGCCTTAACGAAATTATGGCTAACTACTTGATTATAACGAACGCCTTTGGGCTTGGGAAT  
CATGGCGCTCAGAAGTTGGCAAACAGCTTCGCCACTCTATGAGGAGTACGTTGTTCTTAAGAATGAGATGGCTC  
GCGCTAACCAATTATGAAGATTATGGCGATTATTGGCGCGGCGATTATGAAGTTAACGGCGTTGATGGCTATGATTAT  
TCACGCGCCAGCTTATTGAAGATGTTGAACATACATTTGAAGAAATTAACCGCTCTACGAGCACTTGCATGCT  
TATGTTGCGCTAAACTTATGAACGCTTATCCTTCATATATTTACCTATTGGCTGTCTTCTGCTCATCTTCTTGGC  
GATATGTGGGGTCGTTTTTGGACGAACCTTTATTCACCTACAGTTCCTTTCCGACAGAAGCCGAATATTGATGTTA  
CAGATGCTATGGTTGATCAGGCTTGGGATGCTCAGCGCATATTCAAGGAGGCTGAGAAGTTCTTCGTTTCGGTGTG  
GCCTTCTAACATGACACAGGGCTTCTGGGAGAACTCAATGCTTACAGATCCTGGCAACGTTTCAGAAAGCTGTT  
TGTCATCCTACAGCTTGGGATCTTGGCAAAGGCGATTTACAGATCCTTATGTGTACAAAGGTAACCTATGGATGATT  
TCCTAACCGCACACCAGAGATGGGCCATATTCAGTATGATATGGCTTATGCTGCTCAGCCTTTCCTGTTACGCCAA  
CGGCGCTAACGAAGGCTTTCATGAAGCTGTTGGCGAAATATGTCACCTTCAGCTGCTACACCTAAACATCTTAA  
ATCAATTGGCCTTCTTTCACCTGATTTCCAAGAGGATAACGAAACAGAAATTAACCTTCTTCTTAAACAGGCTCTT  
ACAATTGTTGGCACACTTCCTTTCACCTACATGCTTGAGAAGTGGCGGTGGATGGTATTCAAGGGTGAAATTCCT  
AAAGATCAGTGGATGAAGAAGTGGTGGGAAATGAAACGCGAAATGTTGGCGTGTGTTGAACCTGTTCTCTCATGA  
TGAAACATATTGTGATCCTGCTTCATTGTTCCACGTATCAAACGATTATTCATTTATTCGCTATTATACACGCACACT  
TTATCAGTTTCAGTTTCAGGAAGCTCTTGTGTCAGGCTGCTAAACATGAAGGCCCTTTCATAAATGTGATATTCA  
AACTCAACAGAAGCTGGCCAGAACTGTTCAATATGCTTCGCCTTGGCAAATCAGAACCTTGGACACTTGCTCT  
TGAGAATGTAGTTGGCGCTAAGAATATGAACGTTCCGCCTTCTTAACTATTTCCGAGCCGTTATTACGTGGCTT  
AAAGATCAGAACAAGAATAGTTTCGTAGGGTGGTCAACAGATTGGTACCTTATGCTGATCATCATCATCATCATC  
ATTGACTCGAG

## 3. SARS-CoV-2 RBD wt, tagged with 6xHis, cloned into pCAGGS with EcoRI and XhoI

ATGTTTGTGTTTCTTGTGCTTCTTCTCTTGTGTCATCACAATGCAGAGTGCAACCTACAGAATCAATCGTGAGAT  
TTCCTAACATCACAAACCTTTGCCCTTTCGGCGAGGTGTTAACGCAACAAGATTGTCATCAGTGTACGCATGGA  
ACAGAAAGCGTATATCAAACCTGCGTGGCAGATTACTCAGTGCTTTACAACCTCAGCATCATTAGTACGTTTAAAT  
GCTACGGAGTGTACCTACAAAGCTAAATGATCTTTGCTTTACAAACGTGTACGCAGATTCATTTGTGATCAGAG  
GAGATGAAGTGAGACAAATCGCACCTGGACAAACAGGAAAGATTGCCGATTACAACCTACAAACTTCTCTGATGAT  
TTCACCGGCTGCGTGATCGCATGGAACCTAAACAACCTTGATTCAAAGGTAGGTGGTAATTATAATTATTTGTATA  
GGCTCTTTCGTAAGAGCAACTTAAAGCCATTTGAGCGAGATATCTCAACAGAAATCTACCAAGCAGGATCAACA  
CCTTGCAACGGAGTGAAGGATTTAACTGCTACTTTCCTCTTCAATCATACGGATTTCAACCTACAAACGGAGTG  
GGATACCAACCTTACAGAGTGGTGGTCTTTCATTTGAACTTCTTACGCACCTGCAACAGTGTGCGGACCTAAG  
AAGAGCACGAACCTTGTGAAGAATAAGTGCCTGAACTTTCACCACCACCACCCTGA

**4. SARS-CoV-2 RBD wt, tagged with 6xHis, cloned into pFASTBAC<sup>TM</sup>1 with EcoRI and XhoI**

ATGTTTGTGTTTCTTGTGCTTCTTCCTCTTGTGTCATCACAATGCAGAGTGCAACCTACAGAATCAATCGTGAGAT  
TTCCTAACATCACAAACCTTTGCCCTTTTCGGCGAGGTGTTAACGCAACAAGATTTGCATCAGTGTACGCATGGA  
ACAGAAAGCGTATATCAAACCTGCGTGGCAGATTACTCAGTGCTTTACAACCTCAGCATCATTAGTACGTTTAAAT  
GCTACGGAGTGTACCTACAAAGCTAAATGATCTTTGCTTTACAAACGTGTACGCAGATTCATTTGTGATCAGAG  
GAGATGAAGTGAGACAAATCGCACCTGGACAAACAGGAAAGATTGCCGATTACAACCTACAACCTCCTGATGAT  
TTCACCGGCTGCGTGTATCGCATGGAACCTCAAACAACCTTGATTCAAAGGTAGGTGGTAATTATAATTATTGTATA  
GGCTCTTTTCGTAAGAGCAACTTAAAGCCATTTGAGCGAGATATCTCAACAGAAATCTACCAAGCAGGATCAACA  
CCTTGAACGGAGTGGAAGGATTTAACTGCTACTTTCCTCTTCAATCATAACGGATTTCACCTACAACGGAGTG  
GGATACCAACCTTACAGAGTGGTGGTCTTTCATTTGAACTTCTTACGCACCTGCAACAGTGTGCGGACCTAAG  
AAGAGCACGAACCTTGTGAAGAATAAGTGCGTGAACCTTTCACCACCACCACCACCTGA

**5. SARS-CoV-2 RBD K417V, tagged with 6xHis, cloned into pCAGGS with EcoRI and XhoI**

GAATTCGCCACCATGTTTGTGTTTCTTGTGCTTCTTCCTCTTGTGTCATCACAATGCAGAGTGCAACCTACAGAAT  
CAATCGTGAGATTTCTAACATCACAAACCTTTGCCCTTTTCGGCGAGGTGTTAACGCAACAAGATTTGCATCAG  
TGTACGCATGGAACAGAAAGCGTATATCAAACCTGCGTGGCAGATTACTCAGTGCTTTACAACCTCAGCATCATTCA  
GTACGTTTAAATGCTACGGAGTGTACCTACAAAGCTAAATGATCTTTGCTTTACAAACGTGTACGCAGATTCATT  
TGTGATCAGAGGAGATGAAGTGAGACAAATCGCACCTGGACAAACAGGAGTGATTGCCGATTACAACCTACAAA  
CTTCTGATGATTTACCGGCTGCGTGATCGCATGGAACCTCAAACAACCTTGATTCAAAGGTAGGTGGTAATTATA  
ATTATTTGTATAGGCTCTTTCGTAAGAGCAACTTAAAGCCATTTGAGCGAGATATCTCAACAGAAATCTACCAAGC  
AGGATCAACACCTTGCAACGGAGTGGAAGGATTTAACTGCTACTTTCCTCTTCAATCATAACGGATTTCACCTAC  
AAACGGAGTGGGATACCAACCTTACAGAGTGGTGGTCTTTCATTTGAACTTCTTACGCACCTGCAACAGTGT  
GCGGACCTAAGAAGAGCACGAACCTTGTGAAGAATAAGTGCGTGAACCTTTCACCACCACCACCACCTGACT  
CGAG

**6. SARS-CoV-2 RBD K417N, tagged with 6xHis, cloned into pCAGGS with EcoRI and XhoI**

GAATTCGCCACCATGTTTGTGTTTCTTGTGCTTCTTCCTCTTGTGTCATCACAATGCAGAGTGCAACCTACAGAAT  
CAATCGTGAGATTTCTAACATCACAAACCTTTGCCCTTTTCGGCGAGGTGTTAACGCAACAAGATTTGCATCAG  
TGTACGCATGGAACAGAAAGCGTATATCAAACCTGCGTGGCAGATTACTCAGTGCTTTACAACCTCAGCATCATTCA  
GTACGTTTAAATGCTACGGAGTGTACCTACAAAGCTAAATGATCTTTGCTTTACAAACGTGTACGCAGATTCATT  
TGTGATCAGAGGAGATGAAGTGAGACAAATCGCACCTGGACAAACAGGAAACATTGCCGATTACAACCTACAAA  
CTTCTGATGATTTACCGGCTGCGTGATCGCATGGAACCTCAAACAACCTTGATTCAAAGGTAGGTGGTAATTATA  
ATTATTTGTATAGGCTCTTTCGTAAGAGCAACTTAAAGCCATTTGAGCGAGATATCTCAACAGAAATCTACCAAGC  
AGGATCAACACCTTGCAACGGAGTGGAAGGATTTAACTGCTACTTTCCTCTTCAATCATAACGGATTTCACCTAC  
AAACGGAGTGGGATACCAACCTTACAGAGTGGTGGTCTTTCATTTGAACTTCTTACGCACCTGCAACAGTGT  
GCGGACCTAAGAAGAGCACGAACCTTGTGAAGAATAAGTGCGTGAACCTTTCACCACCACCACCACCTGACT  
CGAG

### **7. SARS-CoV-2 RBD 501Y, tagged with 6xHis, cloned into pCAGGS with EcoRI and XhoI**

GAATTCGCCACCATGTTTGTGTTTCTTGTGCTTCTTCTCTTGTGTCATCACAATGCAGAGTGCAACCTACAGAAT  
CAATCGTGAGATTTCTAACATCACAAACCTTTGCCCTTTCGGCGAGGTGTTAACGCAACAAGATTTGCATCAG  
TGTACGCATGGAACAGAAAGCGTATATCAAACCTGCGTGGCAGATTACTCAGTGCTTTACAACCTCAGCATCATTCA  
GTACGTTTAAATGCTACGGAGTGTACCTACAAAGCTAAATGATCTTTGCTTTACAAACGTGTACGCAGATTCAAT  
TGTGATCAGAGGAGATGAAGTGAGACAAATCGCACCTGGACAAACAGGAAAGATTGCCGATTACAACCTACAAA  
CTTCTGATGATTTACCCGGCTGCGTGATCGCATGGAACCTCAAACAACCTTGATTCAAAGGTAGGTGGTAATTATA  
ATTATTTGTATAGGCTCTTTCGTAAAGAGCAACTTAAAGCCATTTGAGCGAGATATCTCAACAGAAATCTACCAAGC  
AGGATCAACACCTTGCAACGGAGTGGAAGGATTTAACTGCTACTTTCCTCTTCAATCATAACGGATTTCAACCTAC  
ATACGGAGTGGGATACCAACCTTACAGAGTGGTGGTGCTTTCATTGAACTTCTTACGCACCTGCAACAGTGTG  
CGGACCTAAGAAGAGCACGAACCTTGTGAAGAATAAGTGCCTGAACTTTCACCACCACCACCACCCTGACTC  
GAG

### **8. MERS-CoV RBD, tagged with 6xHis, cloned into pCAGGS with EcoRI and XhoI**

GAATTCGCAAAACCTTCTGGCTCAGTTGTGGAACAGGCTGAAGGTGTTGAATGTGATTTTTCACCTCTTCTGTCT  
GGCACACCTCCTCAGGTTTATAATTTCAAGCGTTTGGTTTTTACCAATTGCAATTATAATCTTACCAAATTGCTTTC  
ACTTTTTTCTGTGAATGATTTTACTTGTAGTCAAATATCTCCAGCAGCAATTGCTAGCAACTGTTATTCTTCACTGA  
TTTTGGATTACTTTTTCATACCCACTTAGTATGAAATCCGATCTCAGTGTTAGTTCTGCTGGTCCAATATCCCAGTTT  
AATTATAACAGTCCTTTTCTAATCCCACATGTTTGATTTTAGCGACTGTTCTCATAACCTTACTACTATTACTAAG  
CCTCTTAAGTACAGCTATATTAACAAGTGCTCTCGTCTTCTTCTGATGATCGTACTGAAGTACCTCAGTTAGTGA  
ACGCTAATCAATACTCACCTGTGTATCCATTGTCCCATCCACTGTGTGGGAAGACGGTGATTATTATAGGAAACA  
ACTATCTCCACTTGAAGGTGGTGGCTGGCTTGTGTAGTGGCTCAACTGTTGCCATGACTGAGCAATTACAGAT  
GGGCTTTGGTATTACAGTTCAATATGGTACAGACACCAATAGTGTGTTGCCCAAGCTTGAATTTGCTAATGACACA  
AAAATTGCCTCTCAATTAGGCAATTGCGTGGAATATTCCCACCACCACCACCACCCTGACTCGAG

### **Supplementary References**

1. Kumar S, Stecher G, Li M, Knyaz C, Tamura K. MEGA X: molecular evolutionary genetics analysis across computing platforms. *Mol Biol Evol* **35**, 1547-1549. (2018).
2. Robert X, Gouet P. Deciphering key features in protein structures with the new ENDscript server. *Nucleic Acids Res* **42**, W320-324. (2014).
